# Supplementary material for: Anti-tumor effects of anti-programmed cell death-1 antibody treatment are attenuated in streptozotocin-induced diabetic mice
Source: Springer Nature journal article supplement (doi:10.1038/s41598-023-33049-7), 2023-04-12
Supplement: MOESM1 [file 41598_2023_33049_MOESM1_ESM.pdf]

**Title: Anti-tumor effects of anti-programmed cell death-1 antibody treatment are attenuated in streptozotocin-induced diabetic mice**

Masaaki Ito<sup>1</sup>, Shintaro Iwama<sup>1</sup>, Daisuke Sugiyama<sup>2</sup>, Yoshinori Yasuda<sup>1</sup>, Takayuki Okuji<sup>1</sup>, Tomoko Kobayashi<sup>1</sup>, Xin Zhou<sup>1</sup>, Ayana Yamagami<sup>1</sup>, Takeshi Onoue<sup>1</sup>, Takashi Miyata<sup>1</sup>, Mariko Sugiyama<sup>1</sup>, Daisuke Hagiwara<sup>1</sup>, Hidetaka Suga<sup>1</sup>, Ryoichi Banno<sup>1,3</sup>, Hiroyoshi Nishikawa<sup>2,4</sup>, Hiroshi Arima<sup>1</sup>

**Affiliation:**

<sup>1</sup>Department of Endocrinology and Diabetes, Nagoya University Graduate School of Medicine, Nagoya 466-8550, Japan

<sup>2</sup>Department of Immunology, Nagoya University Graduate School of Medicine, Nagoya 466-8550, Japan.

<sup>3</sup>Research Center of Health, Physical Fitness and Sports, Nagoya University, Nagoya, 464-8601, Japan

<sup>4</sup>Division of Cancer Immunology, Research Institute/Exploratory Oncology Research & Clinical Trial Center (EPOC), National Cancer Center, Tokyo 104-0045, Japan.

**Correspondence to:**

Shintaro Iwama, M.D., Ph.D.

Department of Endocrinology and Diabetes, Nagoya University Graduate School of Medicine, Nagoya 466-8550, Japan

Phone: (+81) 52-744-2194

Fax. (+81) 52-744-2212

E-mail: [siwama@med.nagoya-u.ac.jp](mailto:siwama@med.nagoya-u.ac.jp)

**A**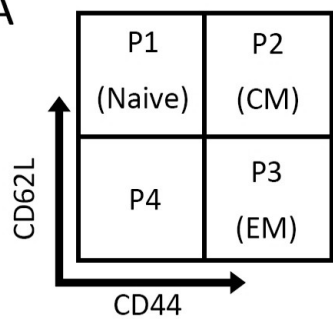**B**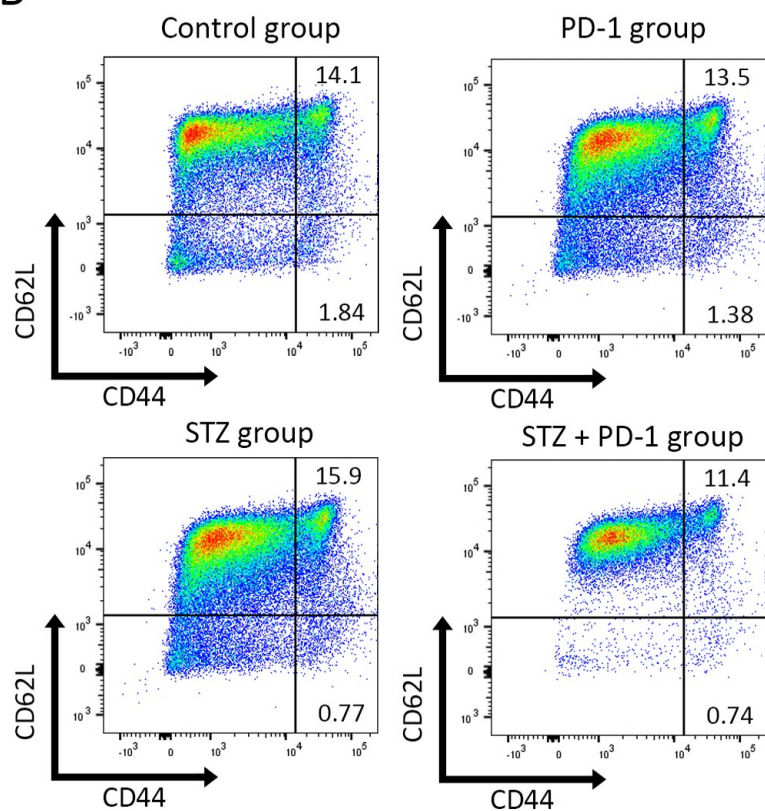**C**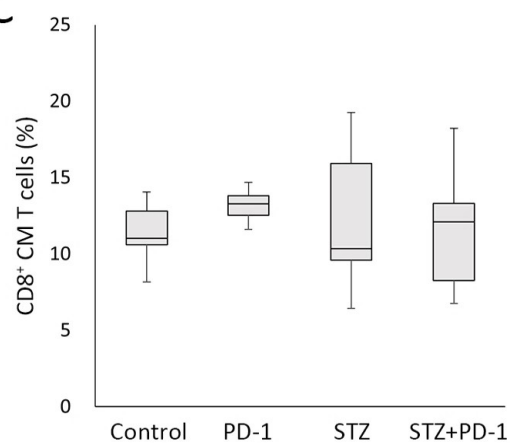**D**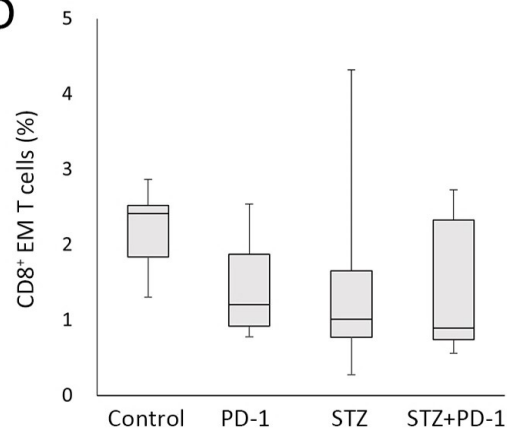**E**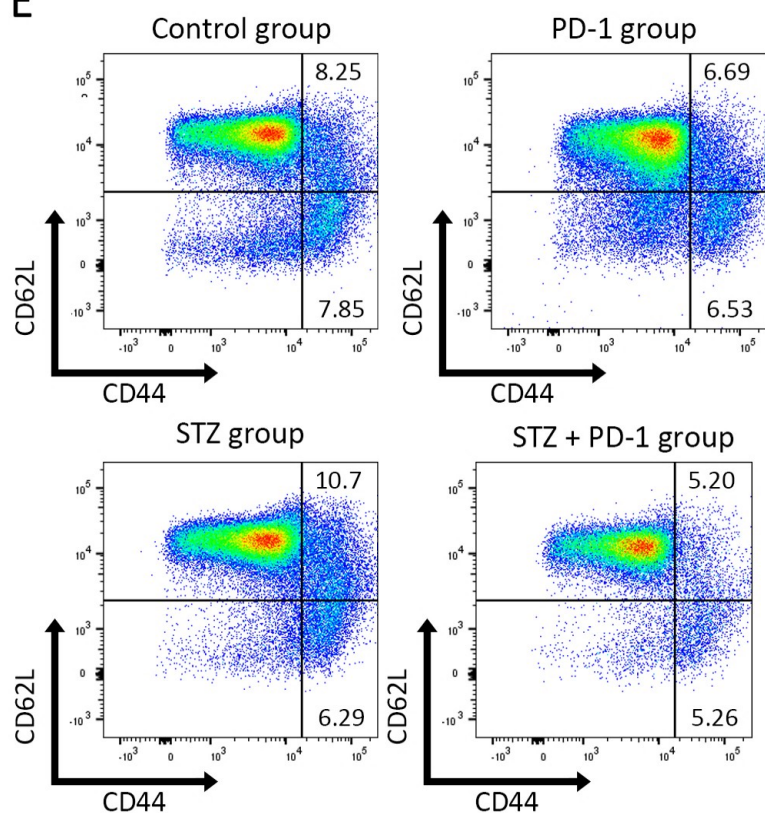**F**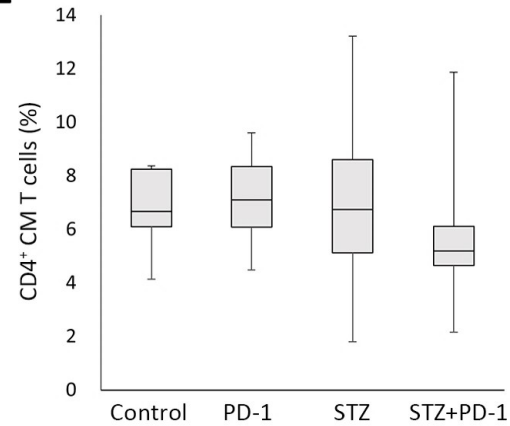**G**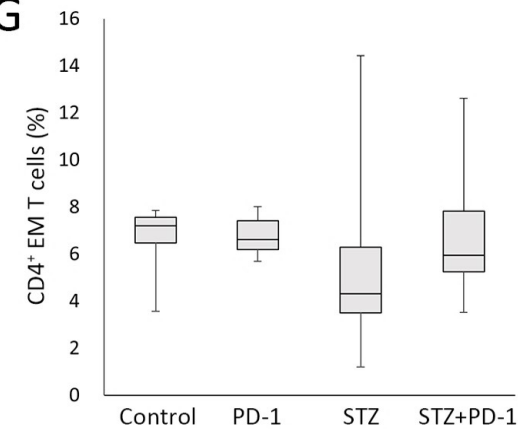

**Supplementary Figure S1. STZ-induced diabetes does not change the frequency of memory T cell subsets.**

(A) Flow cytometry gating for the identification of central memory (CM) T cells and effector memory T cells (EM) in dLNs by differential expression of CD44 and CD62L. P2 (CM T cells); CD44<sup>+</sup> CD62L<sup>+</sup>, P3 (EM T cells); CD44<sup>+</sup>, CD62L<sup>-</sup>, P1 (Naïve T cells); CD44<sup>-</sup> CD62L<sup>+</sup>, P4; CD44<sup>-</sup> CD62L<sup>-</sup>. (B and E) Representative plots of expression of CD44 and CD62L on CD8<sup>+</sup> T cells (B) or CD4<sup>+</sup> T cells (E) in dLNs. (C and F) Box and whisker plots of frequencies of CM T cells within the CD8<sup>+</sup> T cell (C) and CD4<sup>+</sup> T cell (F) compartments in dLNs. (D and G) Box and whisker plots of frequencies of EM T cells within the CD8<sup>+</sup> T cell (D) and CD4<sup>+</sup> T cell compartments (G) in dLNs. On day 14, dLNs were isolated from mice in the control, PD-1, STZ, and STZ+PD-1 groups. Boxes indicate median values with the interquartile range, and whiskers indicate the lowest and highest values. *dLNs*: tumor-draining lymph nodes, *STZ*; streptozotocin, *PD-1*; programmed cell death-1.

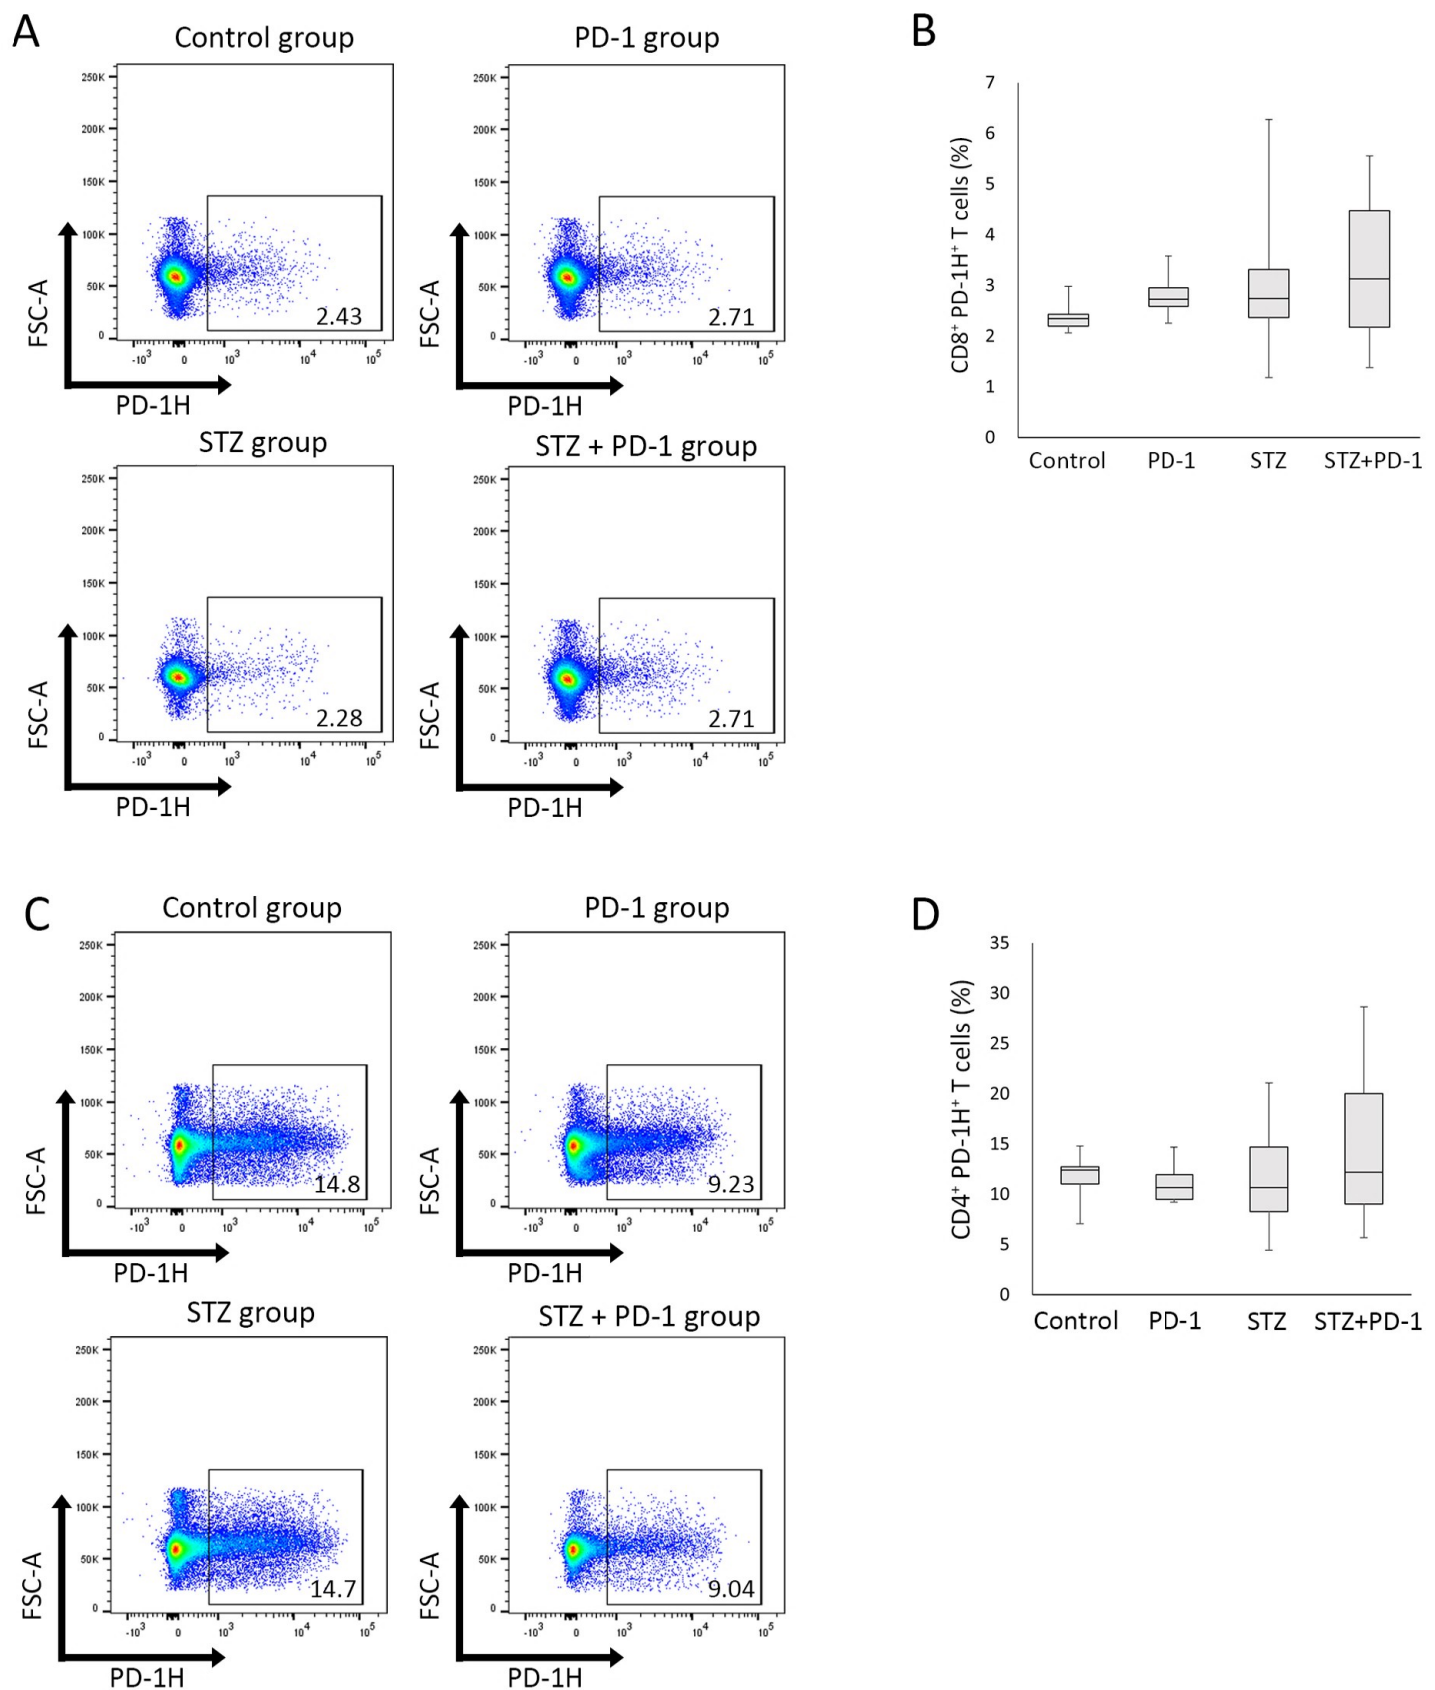

**Supplementary Figure S2. STZ-induced diabetes does not change the frequency of PD-1H<sup>+</sup> cells within the T cell population.**

(A and C) Representative plots of the expression of PD-1H on CD8<sup>+</sup> T cells (A) or CD4<sup>+</sup> T cells (C) in dLNs.

(B and D) Box and whisker plots of the frequencies of PD-1H<sup>+</sup> cells within the CD8<sup>+</sup> T cell (B) and CD4<sup>+</sup> T cell (D) compartments in dLNs. On day 14, dLNs were isolated from mice in the control, PD-1, STZ, and STZ+PD-1 groups.

Boxes indicate median values with the interquartile range, and whiskers indicate the lowest and highest values.

dLNs: tumor-draining lymph nodes, FSC; forward scatter, STZ; streptozotocin, PD-1; programmed cell death-1, PD-1H; programmed cell death-1 homolog.

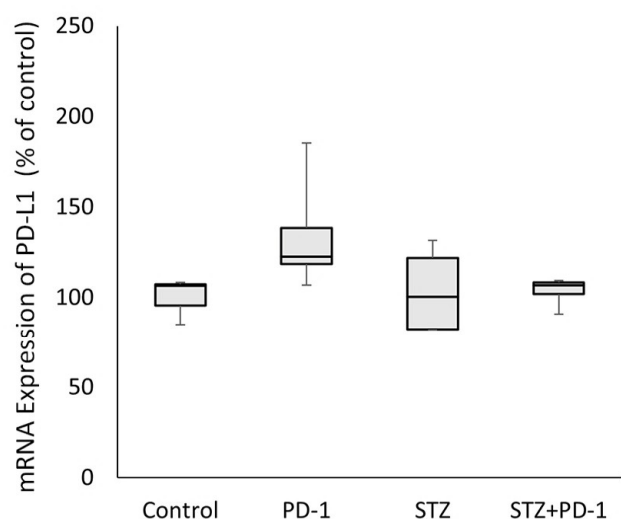

**Supplementary Figure S3. STZ-induced diabetes does not change the mRNA expression levels of PD-L1 in tumors.**

The mRNA expression of PD-L1 as assessed by qRT-PCR in tumors of mice in the control (n = 3), PD-1 (n = 4), STZ (n = 3), or STZ+PD-1 (n = 4) groups. Boxes indicate median values with the interquartile range, and whiskers indicate the lowest and highest values.

*PD-1*; programmed cell death-1, *PD-L1*; programmed cell death ligand 1, *qRT-PCR*; quantitative real-time reverse transcriptase polymerase chain reaction, *STZ*; streptozotocin.

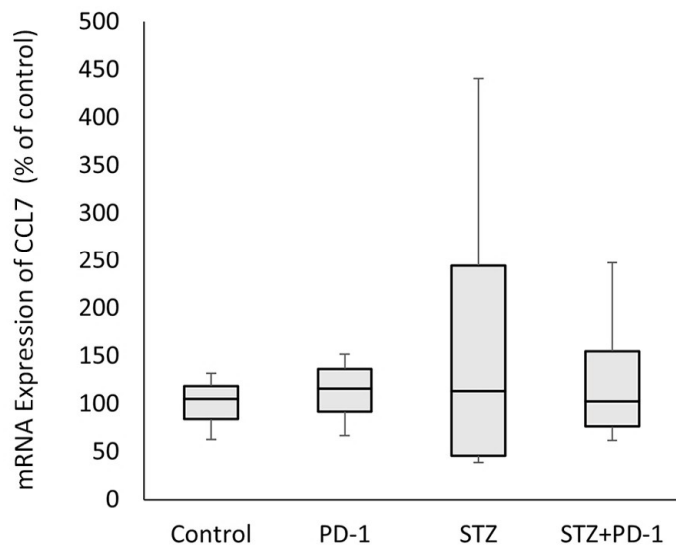

**Supplementary Figure S4. The mRNA expression levels of CCL7 in MC38 tumor from STZ-induced diabetic mice.**

The mRNA expression levels of CCL7 as assessed by qRT-PCR in MC38 tumor in the control, PD-1, STZ, and STZ+PD-1 groups. Boxes indicate median values with the interquartile range, and whiskers indicate the lowest and highest values.

*CCL7*; C-C motif chemokine ligand 7, *qRT-PCR*; quantitative real-time reverse transcriptase polymerase chain reaction, *STZ*; streptozotocin.



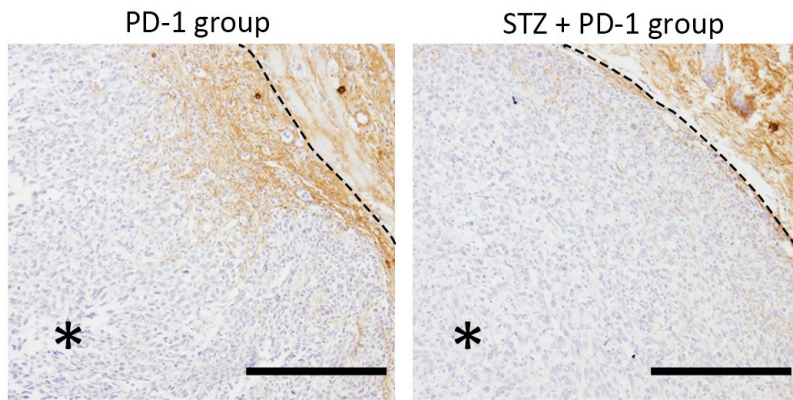

**Supplementary Figure S5. Immunohistochemical staining of CD11c<sup>+</sup> cells in the MC38 tumors of mice in the PD-1 or STZ+PD-1 groups.**

Immunohistochemical staining of CD11c<sup>+</sup> cells in the MC38 tumors of mice in the PD-1 or STZ+PD-1 groups.

Scale bars, 200 μm. The dashed line indicates the edge of the tumor. \*Tumor tissue area.

*PD-1*; programmed cell death-1, *STZ*; streptozotocin.

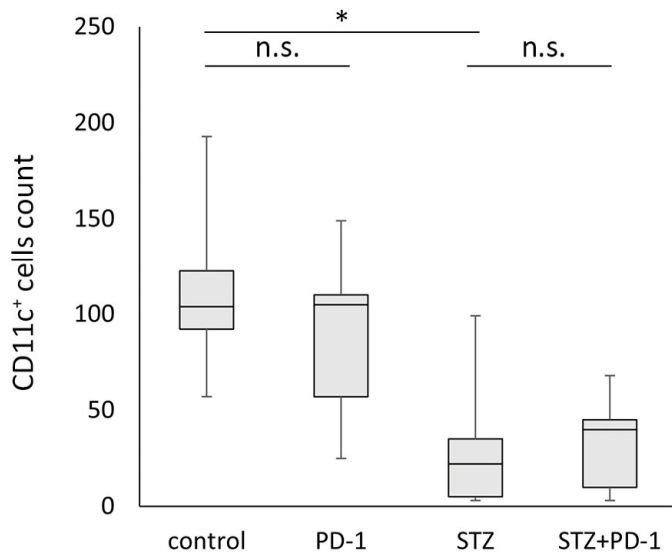

**Supplementary Figure S6. The number of CD11c<sup>+</sup> cells in MC38 tumors were no differences between the control and PD-1 groups and between STZ and STZ-PD-1 groups.**

The number of CD11c<sup>+</sup> cells in MC38 tumors in the control, PD-1, STZ, and STZ+PD-1 groups. Boxes indicate median values with interquartile range, and whiskers indicate the lowest and highest values. One-way ANOVA and Tukey's test are used. \*P < 0.05.

*ANOVA*; analysis of variance, *n.s.*; not significant, *PD-1*; programmed cell death -1, *STZ*; streptozotocin.



**A**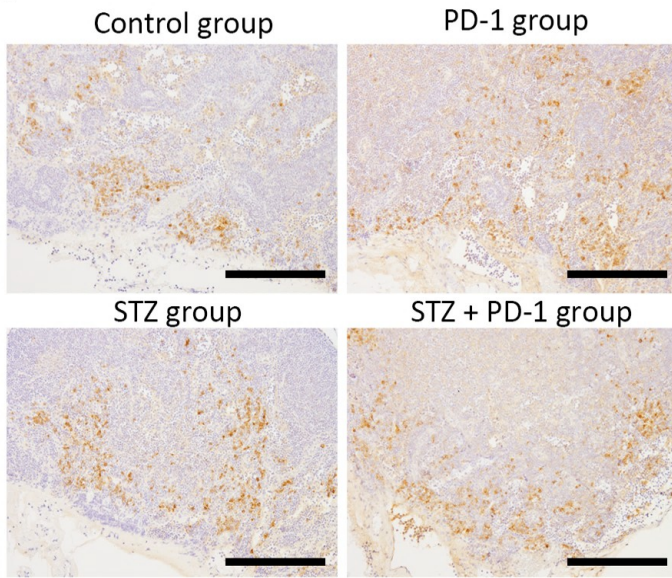**B**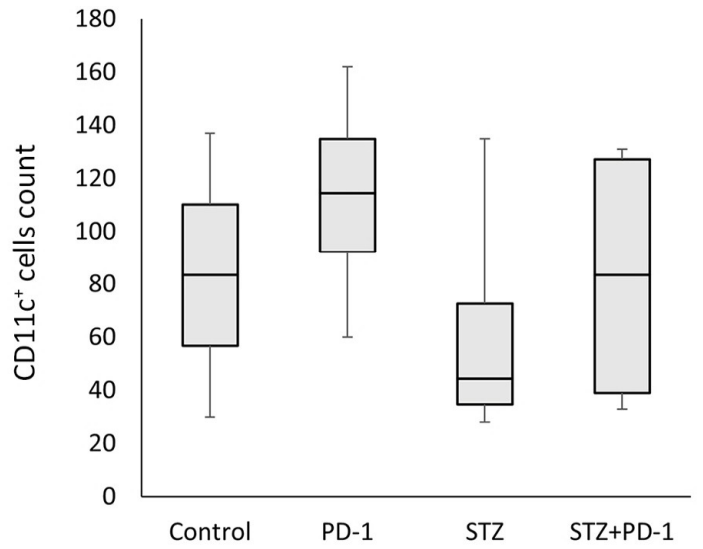

**Supplementary Figure S7. The number of CD11c<sup>+</sup> cells in dLNs were no differences among the control, PD-1, STZ and STZ+PD-1 groups.**

(A) Immunohistochemical staining of CD11c<sup>+</sup> cells in dLNs of mice in the control, PD-1, STZ, and STZ+PD-1 groups. Scale bars, 200  $\mu$ m. (B) The number of CD11c<sup>+</sup> cells in dLNs in the control, PD-1, STZ, and STZ+PD-1 groups. Boxes indicate median values with interquartile range, and whiskers indicate the lowest and highest values.

*dLNs: tumor-draining lymph nodes, PD-1; programmed cell death -1, STZ; streptozotocin.*

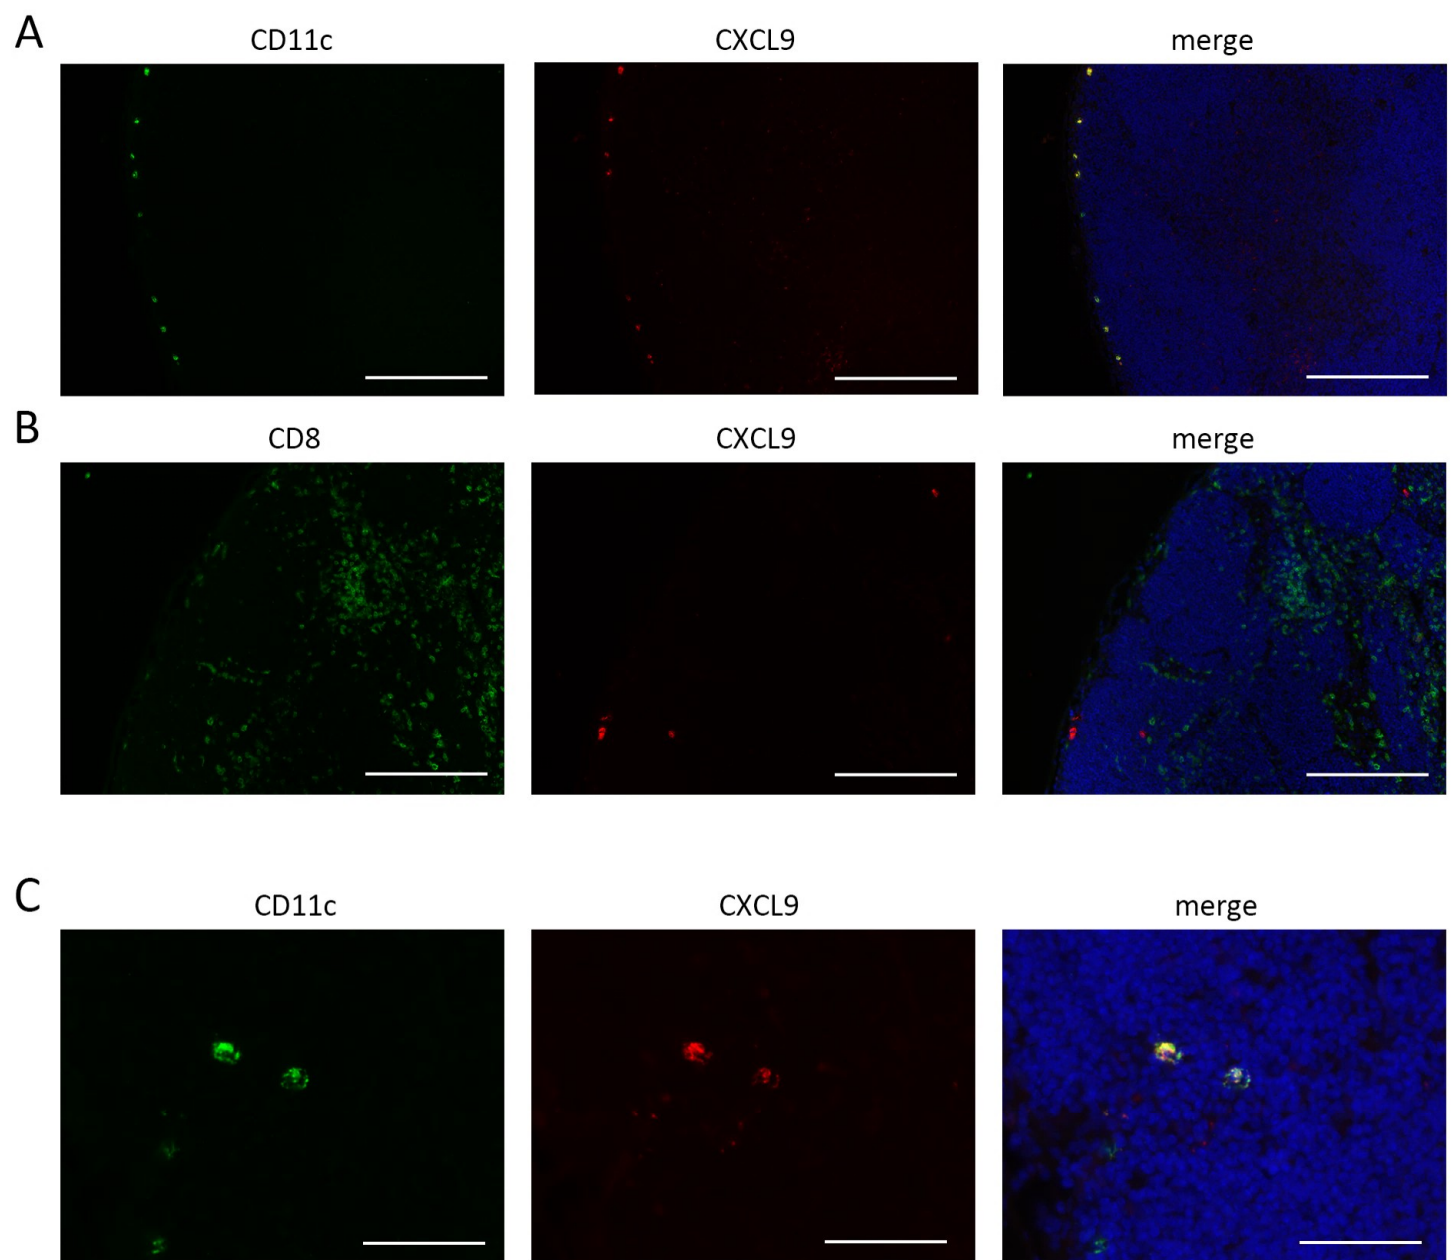

**Supplementary Figure S8. Low and high magnification images showing the presence of CXCL9<sup>+</sup> CD11c<sup>+</sup> cells and CD8<sup>+</sup> cells in dLNs.**

(A and B) Double immunofluorescence microscopy shows the expression of CXCL9 (red) on CD11c<sup>+</sup> cells (green) (A) or CD8<sup>+</sup> cells (green) (B) in dLNs, respectively. Scale bars, 200  $\mu\text{m}$ . (C) Double immunofluorescence microscopy shows the expression of CXCL9 (red) on CD11c<sup>+</sup> cells (green) in dLNs. Scale bars, 50  $\mu\text{m}$ .

*dLNs: tumor-draining lymph nodes, PD-1; programmed cell death -1, STZ; streptozotocin.*

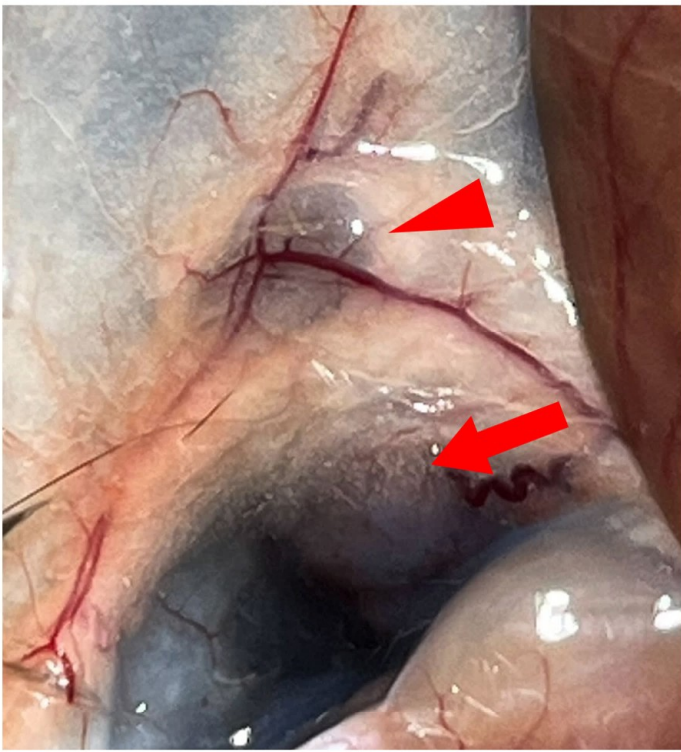

**Supplementary Figure S9. Image showing dye flow of trypan blue in a dLN.**

Image showing dye flow 24 hours after the injection of 0.4% trypan blue into MC38 tumor. The arrowhead represents a dLN. The arrow represents MC38 tumor.

*dLN: tumor-draining lymph node.*

| gene           | Log10 (HG-MC38 $2^{-\Delta Ct}$ ) | Log10 (LG-MC38 $2^{-\Delta Ct}$ ) |
|----------------|-----------------------------------|-----------------------------------|
| CCL7           | -2.0085                           | -1.6280                           |
| CXCL1          | -2.2794                           | -2.1307                           |
| CCL2           | -0.5214                           | -0.3757                           |
| CMTM3          | -1.3703                           | -1.2607                           |
| CCR10          | -2.5774                           | -2.5160                           |
| TLR4           | -2.1951                           | -2.1367                           |
| CCL25          | -1.9724                           | -1.9170                           |
| CXCL3          | -2.6737                           | -2.6304                           |
| CCL8           | -2.6347                           | -2.6123                           |
| CX3CL1         | -2.3186                           | -2.3053                           |
| MAPK1          | -0.8405                           | -0.8272                           |
| HIF-1 $\alpha$ | -1.1445                           | -1.1313                           |
| MAPK14         | -1.3613                           | -1.3510                           |
| TGF- $\beta$ 1 | -1.2619                           | -1.2697                           |
| CMTM4          | -1.5750                           | -1.5888                           |
| SLIT2          | -1.7526                           | -1.7996                           |
| CXCL10         | -0.9398                           | -1.0620                           |
| CMTM6          | -1.7707                           | -1.8989                           |
| CCL5           | -1.9663                           | -2.1096                           |

**Supplementary Table S1. mRNA expression levels of chemokines and chemokine receptors in MC38 cells cultured in low glucose (LG-MC38) and high glucose (HG-MC38) analyzed by RT2 Profiler PCR Array.**



| gene   | Log10 (Control group 2 <sup>-ΔCt</sup> ) | Log10 (PD-1 group 2 <sup>-ΔCt</sup> ) |
|--------|------------------------------------------|---------------------------------------|
| CXCL9  | -1.8561                                  | -1.6545                               |
| CCR6   | -1.3083                                  | -1.1277                               |
| CXCL13 | -0.0199                                  | 0.1306                                |
| CXCR4  | -0.7243                                  | -0.5858                               |
| CXCR5  | -1.7538                                  | -1.6183                               |
| CCRL2  | -2.2927                                  | -2.1782                               |
| CXCL10 | -1.1788                                  | -1.1006                               |
| CCR3   | -2.0067                                  | -1.9374                               |
| MAPK1  | -1.0795                                  | -1.0313                               |
| CXCR3  | -1.5100                                  | -1.4829                               |
| CMTM6  | -1.5882                                  | -1.5611                               |
| ITGB2  | -0.8597                                  | -0.8688                               |
| CCR8   | -2.3107                                  | -2.3258                               |
| HIF-1α | -1.2089                                  | -1.2270                               |
| MAPK14 | -1.5521                                  | -1.5762                               |
| CCR9   | -2.4191                                  | -2.4582                               |
| TNF    | -2.1451                                  | -2.2054                               |
| CCR7   | -0.6460                                  | -0.7213                               |
| CCL4   | -2.2927                                  | -2.3679                               |
| CCL19  | 0.0975                                   | 0.0163                                |
| TGF-β1 | -1.0012                                  | -1.0825                               |
| CXCL16 | -0.8868                                  | -0.9711                               |
| CCR5   | -1.9465                                  | -2.0338                               |
| CCL8   | -0.2095                                  | -0.3329                               |
| XCL1   | -1.6996                                  | -1.8261                               |
| CCR2   | -1.5521                                  | -1.6906                               |
| TLR4   | -1.8411                                  | -1.9886                               |
| CCL12  | -0.9500                                  | -1.1036                               |
| CCL22  | -1.2059                                  | -1.3896                               |
| TLR2   | -2.0910                                  | -2.2836                               |
| CCL5   | -0.0138                                  | -0.2155                               |
| CMTM3  | -1.2571                                  | -1.4769                               |
| ITGAM  | -1.9043                                  | -2.1241                               |
| CXCL12 | -0.8477                                  | -1.0855                               |
| CXCR6  | -1.6123                                  | -1.8953                               |
| IL16   | -1.4859                                  | -1.8411                               |
| IL1b   | -1.9013                                  | -2.2716                               |
| CCL17  | -1.7689                                  | -2.1421                               |
| CCL6   | -0.8477                                  | -1.2691                               |
| ACKR1  | -1.5732                                  | -2.0127                               |
| CCL9   | -1.8321                                  | -2.2957                               |
| PF4    | -1.7207                                  | -2.2776                               |
| CCL7   | -0.8929                                  | -1.6454                               |
| CCL11  | -1.4498                                  | -2.3198                               |
| CCL2   | -1.0042                                  | -1.9465                               |

**Supplementary Table S2. mRNA expression levels of chemokines and chemokine receptors in tumor-draining lymph nodes of the control group and PD-1 group analyzed by RT2 Profiler PCR Array.**

*PD-1; programmed cell death-1*

| gene   | Log10 (STZ group 2 <sup>-ΔCt</sup> ) | Log10 (STZ+PD-1 group 2 <sup>-ΔCt</sup> ) |
|--------|--------------------------------------|-------------------------------------------|
| CCL6   | -1.0608                              | -0.8513                                   |
| ITGAM  | -2.0482                              | -1.9440                                   |
| CXCR5  | -1.6027                              | -1.5166                                   |
| TNF    | -2.0542                              | -1.9832                                   |
| PF4    | -2.2710                              | -2.2331                                   |
| CXCR3  | -1.4702                              | -1.4504                                   |
| CCR8   | -2.2439                              | -2.2240                                   |
| CCL9   | -2.0602                              | -2.0584                                   |
| CCL22  | -1.1842                              | -1.1855                                   |
| CCL2   | -1.9428                              | -1.9440                                   |
| CXCL12 | -0.9133                              | -0.9175                                   |
| CMTM6  | -1.4281                              | -1.4323                                   |
| IL16   | -1.2776                              | -1.2848                                   |
| MAPK14 | -1.5214                              | -1.5316                                   |
| TLR4   | -1.8525                              | -1.8658                                   |
| CCR6   | -1.0608                              | -1.0921                                   |
| CCL17  | -1.9880                              | -2.0254                                   |
| CCL19  | 0.0831                               | 0.0397                                    |
| CCR5   | -2.0151                              | -2.0675                                   |
| TGF-β1 | -1.0036                              | -1.0590                                   |
| CXCR6  | -1.7984                              | -1.8568                                   |
| CCL11  | -1.8044                              | -1.8808                                   |
| CCL8   | -0.2812                              | -0.3606                                   |
| CCR2   | -1.6478                              | -1.7333                                   |
| CMTM3  | -1.4100                              | -1.4955                                   |
| CCRL2  | -2.0512                              | -2.1367                                   |
| CCL7   | -1.6207                              | -1.7093                                   |
| CCR3   | -1.9428                              | -2.0374                                   |
| IL1b   | -2.3643                              | -2.4618                                   |
| MAPK1  | -0.9344                              | -1.0410                                   |
| ACKR1  | -1.5094                              | -1.6159                                   |
| TLR2   | -2.0422                              | -2.1578                                   |
| CXCR4  | -0.4919                              | -0.6075                                   |
| HIF-1α | -1.0638                              | -1.1885                                   |
| CXCL16 | -0.8531                              | -0.9808                                   |
| XCL1   | -1.9037                              | -2.0584                                   |
| ITGB2  | -0.8501                              | -1.0048                                   |
| CCR7   | -0.6484                              | -0.8333                                   |
| CXCL13 | 0.1312                               | -0.0536                                   |
| CCR9   | -2.3311                              | -2.5160                                   |
| CCL5   | -0.1608                              | -0.3576                                   |
| CCL12  | -0.9133                              | -1.1764                                   |
| CCL4   | -2.4486                              | -2.7238                                   |
| CXCL9  | -1.5756                              | -1.9170                                   |
| CXCL10 | -0.9525                              | -1.3330                                   |

**Supplementary Table S3. mRNA expression levels of chemokines and chemokine receptors in tumor-draining lymph nodes of the STZ group and STZ+PD-1 groups analyzed by RT2 Profiler PCR Array.**

*PD-1; programmed cell death-1*
